# Supplementary material
Source: publisher site journal article supplement (https://www.spandidos-publications.com/1248/downloadSupplementary)

Figure S1. Pathway prediction involving downregulated miRNAs in small intestine of irradiated mice. (A) ‘TNF- $\alpha$  NF- $\kappa$ B Signaling Pathway’. (B) ‘Regulation of Actin Cytoskeleton’. Yellow boxes represent target genes predicted from downregulated miRNAs. miRNA, microRNA.

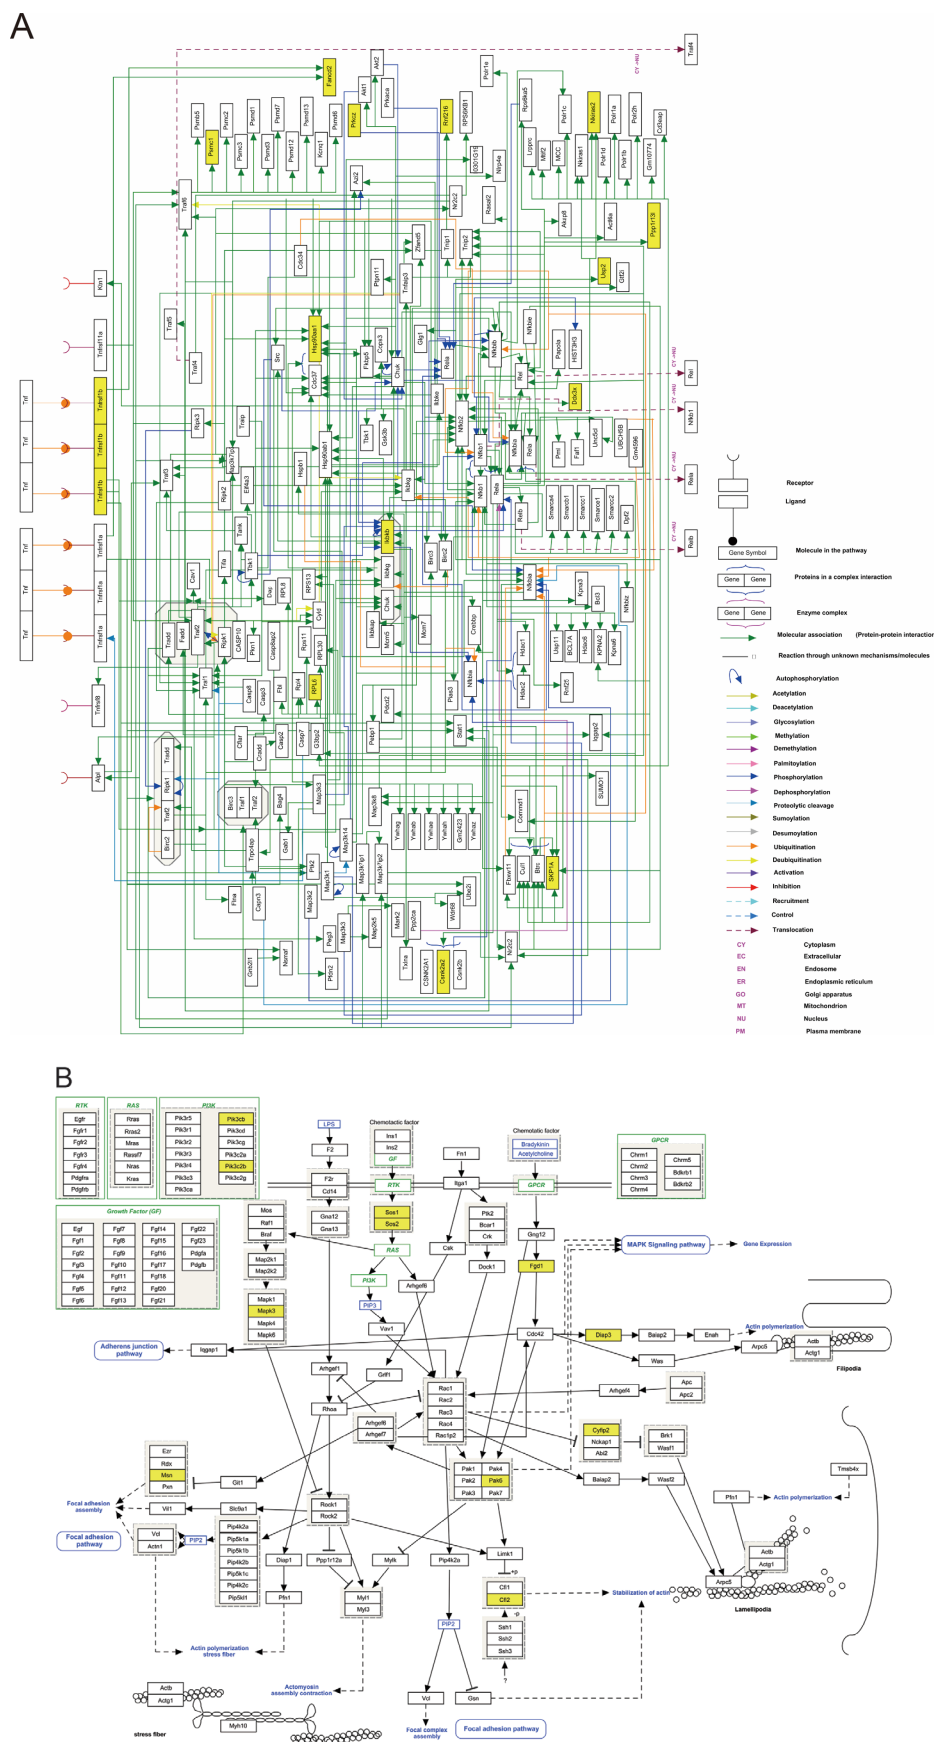

Supplement: Supplementary file 1 [file downloadSupplementary]
